# Supplementary material for: Novel Antioxidant Therapy with the Immediate Precursor to Glutathione, γ-Glutamylcysteine (GGC), Ameliorates LPS-Induced Cellular Stress in In Vitro 3D-Differentiated Airway Model from Primary Cystic Fibrosis Human Bronchial Cells
Source: MDPI journal article supplement (doi:10.3390/antiox9121204), 2020-11-30
Supplement: s1 [file s1]

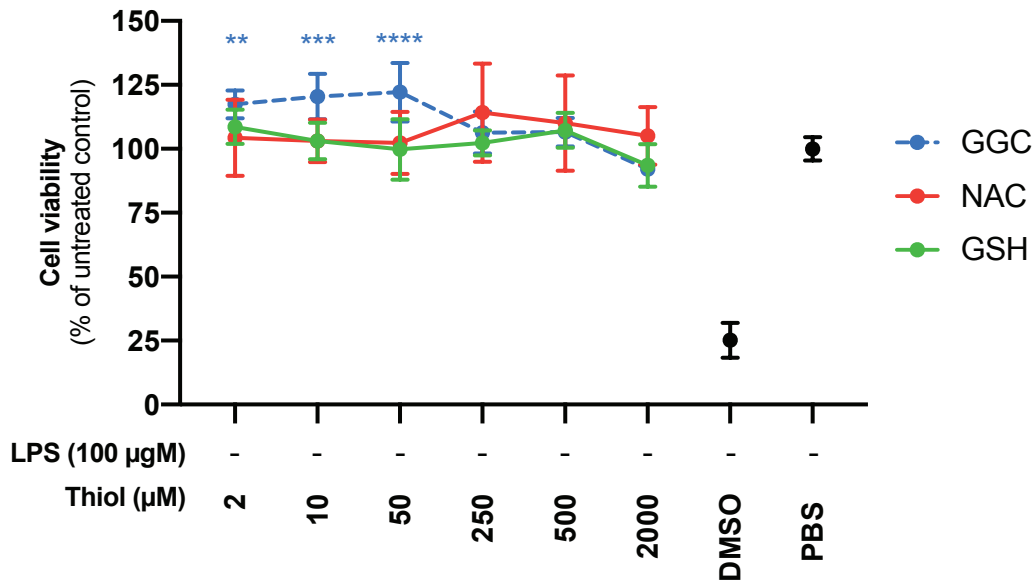

**Figure S1.** GGC increases metabolic viability in human airway epithelial cells from non-cystic fibrosis donors. Treatment of epithelial cultures with GGC, NAC and GSH for 24 h in a range of concentration (2 to 2000μl). DMSO used as positive cell death control. Metabolic viability measured by MTT assay. Statistical analysis was performed using one-way ANOVA against the PBS control. (\* =  $p < 0.05$ , \*\* =  $p < 0.01$ , \*\*\* =  $p < 0.001$ , \*\*\*\* =  $p < 0.0001$ ). Error bars represent SD. Data are from independent experiments performed on non-CF (WT/WT CFTR) airway epithelium cultures from one primary HNEC and one immortalised HBEC, with three technical replicates for each different experimental condition.
