# Supplementary material for: Novel Antioxidant Therapy with the Immediate Precursor to Glutathione, γ-Glutamylcysteine (GGC), Ameliorates LPS-Induced Cellular Stress in In Vitro 3D-Differentiated Airway Model from Primary Cystic Fibrosis Human Bronchial Cells
Source: Antioxidants (Basel). 2020 Nov 30;9(12):1204. doi: 10.3390/antiox9121204 (PMC7760366; doi:10.3390/antiox9121204)
Supplement: Supplementary file 1 [file antioxidants-09-01204-s001.zip]

Archive with 10 entries (10 files):
- FigS1.pdf
- __MACOSX/._FigS1.pdf
- TableS1.docx
- __MACOSX/._TableS1.docx
- TableS2.docx
- __MACOSX/._TableS2.docx
- TableS3_Differential protein abundance analysis.xlsx
- __MACOSX/._TableS3_Differential protein abundance analysis.xlsx
- TableS4_Ingenuity pathway analysis of differentially abundant proteins.xlsx
- __MACOSX/._TableS4_Ingenuity pathway analysis of differentially abundant proteins.xlsx
